# Supplementary material for: Thrombotic Risk Detection in Patients with Polycythemia Vera: The Predictive Role of DNMT3A/TET2/ASXL1 Mutations
Source: PubMed Central journal article supplement (PMC7226609; doi:10.3390/cancers12040934), 2020-04-10
Supplement: cancers-12-00934-s001.pdf [file cancers-12-00934-s001.pdf]

Article

# Thrombotic Risk Detection in Patients with Polycythemia Vera: the Predictive Role of *DNMT3A/TET2/ASXL1* Mutations

## Supplementary Materials:

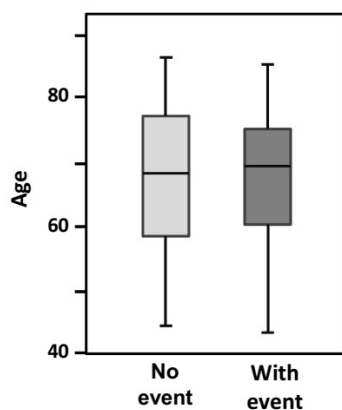

| Group      | <i>n</i> | Mean age | Median age | P25-P75   | <i>p</i> value |
|------------|----------|----------|------------|-----------|----------------|
| No event   | 30       | 67.6     | 68.0       | 58.0-78.0 | 0.915          |
| With event | 25       | 67.2     | 69.0       | 59.5-75.5 |                |

**Figure S1.** Box and whisker plot of age-matched PV patient case-control study cohort. There was no significant difference between the no event and with event groups of patients with PV in the case-control study. The band represents the median value; the whiskers represent the 25<sup>th</sup> (P25) and 75<sup>th</sup> percentiles (P75).

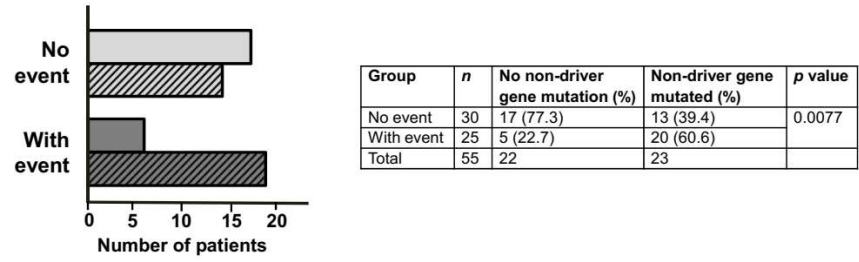

**Figure S2.** Frequency of non-driver gene mutations in the no thrombotic event and with thrombotic event groups of PV patients. Open bars represent no mutation in a non-driver gene, hatched bars represent non-driver gene mutated. Odds ratio 3.85 (95% confidence interval 1.207–12.251).

Table S1. Patient characteristics of whole MPN  $n = 68$ .

| Gender | Diagnosis MPN | Age at diagnosis | Driver gene mutation | Driver gene VAF | Occurrence of thrombosis before diagnosis | Event at diagnosis | Event post-diagnosis | DTA mutation                                   | VAF DTA mutation | Other pathogenic non-driver mutations         | VAF other non-driver mutation | Progression to AML | Exitus     |
|--------|---------------|------------------|----------------------|-----------------|-------------------------------------------|--------------------|----------------------|------------------------------------------------|------------------|-----------------------------------------------|-------------------------------|--------------------|------------|
| 1      | F             | MF               | 79                   | <i>JAK2</i>     | 53.2                                      | no                 | no                   |                                                |                  |                                               |                               |                    |            |
| 2      | M             | MF               | 75                   | TN              |                                           |                    |                      | <i>ASXL1</i><br>c.1900_1922del<br>p.E635Rfs*15 | 40.0             | <i>SRSF2</i> c.284C>G<br>p.P95R               | 41.2                          |                    |            |
| 3      | M             | MF               | 82                   | TN              |                                           | no                 | no                   |                                                |                  | <i>U2AF1</i><br>c.101C>T p.S34F               | 48.1                          |                    | 25/04/2018 |
| 4      | F             | MF               | 32                   | <i>JAK2</i>     | 8.5                                       | no                 | venous               |                                                |                  |                                               |                               |                    |            |
| 5      | F             | MF               | 69                   | <i>CALR</i>     | 39                                        | yes                | venous               |                                                |                  |                                               |                               |                    |            |
| 6      | M             | MF               | 75                   | <i>JAK2</i>     | 33.4                                      | no                 | no                   |                                                |                  |                                               |                               |                    |            |
| 7      | M             | MF               | 81                   | <i>JAK2</i>     | 40.7                                      | no                 | no                   | <i>TET2</i> c.4546C>T p.<br>R1516*             | 42.0             | <i>SRSF2</i><br>c.284_307del<br>p.P95_R102del | 38.7                          |                    |            |
| 8      | F             | MF               | 80                   | <i>MPL</i>      | 32.28                                     | no                 | no                   | <i>TET2</i> c.4954C>T<br>p.Q1652*              | 18.1             |                                               |                               |                    |            |
| 9      | M             | MF               | 64                   | <i>JAK2</i>     | 15.8                                      | yes                | arterial             |                                                |                  |                                               |                               |                    |            |
| 10     | M             | MF               | 63                   | <i>JAK2</i>     | 70.8                                      | no                 | no                   | <i>DNMT3A</i><br>c.1243C>T p.Q415*             | 46.7             | <i>SF3B1</i><br>c.2098A>G<br>p.K700E          | 43.4                          |                    | 23/07/2015 |
| 11     | M             | MF               | 48                   | <i>JAK2</i>     | 23.6                                      | no                 | no                   |                                                |                  |                                               |                               |                    |            |
| 12     | M             | MF               | 88                   | <i>CALR</i>     | 37.6                                      | no                 | no                   |                                                |                  | <i>TP53</i> c.747G>C<br>p.R249S               | 52.6                          |                    | 05/10/2016 |
| 13     | F             | MF               | 69                   | <i>JAK2</i>     | 30.8                                      | no                 | no                   |                                                |                  | <i>TP53</i> c.659A>G<br>p.Y220C               | 59.2                          |                    |            |
| 14     | F             | MF               | 75                   | <i>CALR</i>     | 31.4                                      |                    |                      | <i>TET2</i> c.4317dupA<br>p.R1440Tfs*38        | 3.2              |                                               |                               |                    |            |
| 15     | M             | MF               | 44                   | <i>CALR</i>     | 36.5                                      | no                 | no                   | <i>TET2</i> c.5650delA<br>p.T1884Pfs*3         | 5.5              |                                               |                               |                    | yes        |

| Gender | Diagnosis MPN | Age at diagnosis | Driver gene mutation | Driver gene VAF | Occurrence of thrombosis before diagnosis | Event at diagnosis | Event post-diagnosis | DTA mutation | DTA mutation VAF                                                                                               | Other pathogenic non-driver mutations | DTA mutation VAF other non-driver mutation                                                                              | Progression to AML | Exitus |
|--------|---------------|------------------|----------------------|-----------------|-------------------------------------------|--------------------|----------------------|--------------|----------------------------------------------------------------------------------------------------------------|---------------------------------------|-------------------------------------------------------------------------------------------------------------------------|--------------------|--------|
| 16     | M             | MF               | 70                   | <i>JAK2</i>     | 37.1                                      | no                 | no                   | no           | <i>ASXL1</i><br>c.2444_2447delITGT<br>CinsCG<br>p.L815Pfs*6/c.4334_4335delCT<br>p.S1445*fs*1/c.2077C>T p.R693* | 23.8<br>/3.2<br>/1.7                  | <i>U2AF1</i> c.101C>T<br>p.S34F                                                                                         |                    |        |
| 17     | M             | SMF-post PV      | 75                   | <i>JAK2</i>     | 55.5                                      | no                 | no                   | no           |                                                                                                                |                                       |                                                                                                                         |                    |        |
| 18     | F             | SMF-post PV      | 75                   | <i>JAK2</i>     | 82.2                                      | no                 | venous               | venous       | <i>TET2</i><br>c.1683_1689delACC<br>AGGA<br>p.K561Nfs*5                                                        | 38.3                                  |                                                                                                                         |                    |        |
| 19     | M             | SMF-post PV      | 76                   | <i>JAK2</i>     | 15.9                                      | no                 | no                   | no           | <i>TET2</i> c.3594+1G>T<br>p.?                                                                                 | 13.4                                  | <i>SRSF2</i><br>c.161C>A<br>p.S54Y                                                                                      | 11.1               |        |
| 20     | F             | SMF-post PV      | 68                   | <i>JAK2</i>     | 57                                        | no                 | no                   | no           | <i>TET2</i> c.3500+1G>T<br>p.?                                                                                 | 18.9                                  |                                                                                                                         |                    |        |
| 21     | M             | SMF-post ET      |                      | <i>CALR</i>     | 38.7                                      | no                 | no                   | no           |                                                                                                                |                                       | <i>NRAS</i> c.35G>A<br>p.G12D                                                                                           | 43.9               |        |
| 22     | F             | SMF-post ET      | 49                   | <i>JAK2</i>     | 8.3                                       | no                 | no                   | no           |                                                                                                                |                                       |                                                                                                                         |                    |        |
| 23     | M             | SMF-post PV      | 84                   | <i>JAK2</i>     | 30.3                                      | no                 | no                   | no           |                                                                                                                |                                       |                                                                                                                         |                    |        |
| 24     | M             | SMF-post PV      | 42                   | <i>JAK2</i>     | 93.8                                      | no                 | no                   | no           |                                                                                                                |                                       | <i>NRAS</i> c.68T>C<br>p.L23P<br><i>RUNX1</i><br>c.883_884delTC<br>p.S295Nfs*?,<br><i>SF3B1</i><br>c.1997A>C<br>p.K666T | 7.7                |        |
| 25     | F             | SMF-post ET      | 88                   | <i>JAK2</i>     | 13.3                                      | no                 | no                   | no           |                                                                                                                |                                       |                                                                                                                         | 4.8,               | 40.7   |

| Gender | Diagnosis MPN | Age at diagnosis | Driver gene mutation | Driver gene VAF  | Occurrence of thrombosis before diagnosis | Event at diagnosis | Event post-diagnosis | DTA mutation                    | VAF DTA mutation                                                        | Other pathogenic non-driver mutations | VAF other non-driver mutation | Progression to AML | Exitus     |
|--------|---------------|------------------|----------------------|------------------|-------------------------------------------|--------------------|----------------------|---------------------------------|-------------------------------------------------------------------------|---------------------------------------|-------------------------------|--------------------|------------|
| 26     | M             | SMF-post ET      | 54                   | <i>JAK2/CALR</i> | 21.6                                      | no                 | no                   |                                 |                                                                         |                                       |                               |                    |            |
| 27     | F             | SMF-post ET      | 68                   | <i>MPL</i>       | 66.2                                      | no                 | no                   | <i>DNMT3A</i> c.1095C>A p.Y365* | 42.3                                                                    | <i>ETV6</i> c.577dupT p.S193Ffs*3     | 25.6                          |                    |            |
| 28     | F             | ET               | 62                   | <i>JAK2/CALR</i> | 10.9                                      | no                 | no                   |                                 |                                                                         |                                       |                               |                    |            |
| 29     | F             | ET               | 37                   | <i>TN</i>        |                                           | no                 | no                   |                                 |                                                                         |                                       |                               |                    |            |
| 30     | F             | ET               | 55                   | <i>MPL</i>       | 14.27                                     | no                 | no                   |                                 |                                                                         |                                       |                               |                    |            |
| 31     | F             | ET               | 19                   | <i>MPL</i>       | 1.84                                      | no                 | no                   |                                 |                                                                         |                                       |                               |                    |            |
| 32     | F             | ET               | 47                   | <i>JAK2</i>      | 19.2                                      | no                 | venous               |                                 |                                                                         |                                       |                               |                    |            |
| 33     | F             | ET               | 52                   | <i>JAK2</i>      | 2.6                                       | no                 | venous               |                                 |                                                                         |                                       |                               |                    |            |
| 34     | F             | ET               | 76                   | <i>JAK2</i>      | 40.3                                      | yes                | no                   | venous                          |                                                                         |                                       |                               |                    |            |
| 35     | F             | ET               | 37                   | <i>CALR</i>      | 30.2                                      | no                 | venous               |                                 |                                                                         |                                       |                               |                    |            |
| 36     | F             | ET               | 82                   | <i>CALR</i>      | 37.7                                      | yes                | no                   | arterial                        |                                                                         |                                       |                               |                    |            |
| 37     | F             | ET               | 66                   | <i>JAK2</i>      | 14                                        | no                 | venous               |                                 |                                                                         |                                       |                               |                    |            |
| 38     | F             | ET               | 68                   | <i>JAK2</i>      | 100                                       | no                 | no                   | venous                          |                                                                         | <i>RUNX1</i> c.302T>G p.V101G         | 14.3                          |                    |            |
| 39     | F             | ET               | 63                   | <i>MPL</i>       | 3.8                                       | no                 | no                   | no                              |                                                                         |                                       |                               |                    |            |
| 40     | F             | ET               | 52                   | <i>JAK2</i>      | 23.6                                      | no                 | no                   | venous                          |                                                                         |                                       |                               |                    |            |
| 41     | F             | ET               | 23                   | <i>TN</i>        |                                           | no                 | no                   | no                              |                                                                         |                                       |                               |                    |            |
| 42     | F             | ET               | 40                   | <i>TN</i>        |                                           | no                 | no                   | no                              |                                                                         |                                       |                               |                    |            |
| 43     | M             | ET               | 20                   | <i>TN</i>        |                                           | no                 | no                   | no                              |                                                                         |                                       |                               |                    |            |
| 44     | M             | ET               | 56                   | <i>TN</i>        |                                           | no                 | no                   | no                              | <i>ASXL1</i> c.1773C>A p.Y591*,<br><i>TET2</i> c.3202delC p.Q1068Kfs*14 | 48.9,<br>92.2                         |                               |                    |            |
| 45     | F             | ET               | 76                   | <i>JAK2</i>      | 27.9                                      | no                 | no                   | no                              |                                                                         |                                       |                               |                    | 19/02/2016 |
| 46     | F             | ET               | 73                   | <i>TN</i>        |                                           | no                 | no                   | no                              | <i>DNMT3A</i> c.2583C>A p.C861*                                         | 30.5                                  |                               |                    | yes        |
| 47     | M             | ET               | 79                   | <i>CALR</i>      | 12.6                                      | no                 | no                   | no                              |                                                                         |                                       |                               |                    |            |

| Gender | Diagnosis MPN | Age at diagnosis | Driver gene mutation | Driver gene VAF | Occurrence                     |                    |                      | DTA mutation     | VAF DTA mutation                                                      | Other pathogenic non-driver mutations | VAF other non-driver mutation                  | Progression to AML | Exitus     |
|--------|---------------|------------------|----------------------|-----------------|--------------------------------|--------------------|----------------------|------------------|-----------------------------------------------------------------------|---------------------------------------|------------------------------------------------|--------------------|------------|
|        |               |                  |                      |                 | of thrombosis before diagnosis | Event at diagnosis | Event post-diagnosis |                  |                                                                       |                                       |                                                |                    |            |
| 48     | F             | ET               | 68                   | <i>CALR</i>     | 28.1                           |                    | no                   | no               |                                                                       |                                       |                                                |                    |            |
| 49     | M             | ET               | 72                   | <i>JAK2</i>     | 30.7                           | yes                | no                   | venous, arterial | <i>DNMT3A</i> c.1430-2A>C p.?                                         | 44.8                                  | <i>CEBPA</i> c.355_356delGT p.V119Hfs*50       | 7.5                |            |
| 50     | M             | ET               | 36                   | <i>JAK2</i>     | 3.7                            | no                 | arterial             | no               |                                                                       |                                       |                                                |                    |            |
| 51     | F             | ET               | 27                   | <i>JAK2</i>     | 24.7                           | no                 | no                   | no               |                                                                       |                                       |                                                |                    |            |
| 52     | F             | ET               | 46                   | <i>JAK2</i>     | 13.7                           | no                 | no                   | no               |                                                                       |                                       |                                                |                    |            |
| 53     | M             | PV               | 47                   |                 |                                | no                 | no                   | no               |                                                                       |                                       |                                                |                    |            |
| 54     | M             | PV               | 53                   |                 |                                | no                 | no                   | no               |                                                                       |                                       |                                                |                    |            |
| 55     | F             | PV               | 73                   | <i>JAK2</i>     | 61.8                           | no                 | no                   | no               | <i>DNMT3A</i> c.2645G>A p.R882H                                       | 46.7                                  | <i>TP53</i> c.524G>A p.R175H /c.722C>T p.S241F | 19.9 /64.8         |            |
| 56     | F             | PV               | 70                   | <i>JAK2</i>     | 27.9                           | yes                | arterial             | no               | <i>DNMT3A</i> c.958C>T p.R320*                                        | 50.3                                  |                                                |                    |            |
| 57     | F             | PV               | 74                   | <i>JAK2</i>     | 36.7                           | no                 | no                   | no               |                                                                       |                                       |                                                | yes                | 21/12/2019 |
| 58     | M             | PV               | 38                   | <i>JAK2</i>     | 30.7                           | no                 | no                   | venous           | <i>ASXL1</i> c.4015G>T p.G1339*, <i>TET2</i> c.5458delA p.S1820Vfs*13 | 1.2, 3.2                              |                                                |                    |            |
| 59     | F             | PV               | 73                   | <i>JAK2</i>     | 74.4                           | no                 | no                   | no               |                                                                       |                                       |                                                |                    |            |
| 60     | M             | PV               | 61                   | <i>JAK2</i>     | 49.9                           | yes                | arterial             | no               | <i>DNMT3A</i> c.73-227_177+479del splice_donor_cds_in del             | 1.3                                   |                                                |                    |            |
| 61     | F             | PV               | 86                   | <i>JAK2</i>     | 49.9                           | yes                | no                   | no               | <i>TET2</i> c.1852C>T p.Q618*/c.1630C>T p.R544*<br><i>ASXL1</i>       | 48.0 /45.8                            |                                                |                    |            |
| 62     | M             | PV               | 60                   | <i>JAK2</i>     | 23.8                           | yes                | no                   | no               | <i>c.1900_1922del</i> p.E635Rfs*15                                    | 35.3                                  |                                                |                    | 09/12/2016 |

| Gender | Diagnosis MPN | Age at diagnosis | Driver gene mutation | Driver gene VAF | Occurrence of thrombosis before diagnosis | Event at diagnosis | Event post-diagnosis | DTA mutation | DTA VAF                              | DTA mutation | Other pathogenic non-driver mutations      | DTA VAF other non-driver mutation | Progression to AML | Exitus     |
|--------|---------------|------------------|----------------------|-----------------|-------------------------------------------|--------------------|----------------------|--------------|--------------------------------------|--------------|--------------------------------------------|-----------------------------------|--------------------|------------|
| 63     | F             | PV               | 73                   | <i>JAK2</i>     | 47.7                                      | yes                | venous               | no           | <i>TET2</i> c.3782G>C p.R1261P       | 28.1         |                                            |                                   |                    | 09/12/2016 |
| 64     | F             | PV               | 80                   | <i>JAK2</i>     | 34.6                                      | no                 | no                   | no           | <i>TET2</i> c.5650A>G p.T1884A       | 42.9         |                                            |                                   |                    |            |
| 65     | F             | PV               | 64                   | <i>JAK2</i>     | 60.4                                      | no                 | no                   | venous       | <i>TET2</i> c.5354delA p.K1785Rfs*35 | 2.0          |                                            |                                   |                    |            |
| 66     | F             | PV               | 83                   | <i>JAK2</i>     | 77.2                                      | no                 | no                   | no           |                                      |              | <i>RUNX1</i> c.1265_1266del AG p.E422Afs*? | 28.9                              |                    | yes        |
| 67     | M             | PV               | 68                   | <i>JAK2</i>     | 12.9                                      | no                 | no                   | no           | <i>ASXL1</i> c.1772dupA p.Y591*fs*1  | 5.2          |                                            |                                   |                    |            |
| 68     | M             | PV               | 90                   | <i>JAK2</i>     | 86.7                                      | no                 | no                   | no           |                                      |              | <i>SRSF2</i> c.284C>T p.P95L               | 44.1                              |                    |            |

F: female, M: male, TN: triple negative, VAF: variant allele frequency, DTA: *DNMT3A/TET2/ASXL1*, AML: acute myeloid leukemia

**Table S2.** Frequency of mutation in 1 of the 30 genes included in the myeloid panel (including the driver genes *JAK2*, *CALR* and *MPL*) for the whole MPN patient series.

| MPN   | N patients | At least 1 mutation % (n) | More than 1 mutation % (n) | % patients with mutation (n) | Average VAF % |
|-------|------------|---------------------------|----------------------------|------------------------------|---------------|
| PV    | 16         | 75.0 (12)                 | 25 (4)                     | 25 (4)                       | 28            |
| PMF   | 16         | 62.5 (10)                 | 25 (4)                     | 37.5 (6)                     | 34.5          |
| SMF   | 11         | 72.7 (8)                  | 36.4 (4)                   | 27.3 (3)                     | 43.9          |
| ET    | 25         | 16 (4)                    | 8 (2)                      | 84 (21)                      | 57.4          |
| Total | 68         | 50 (34)                   | 19.1 (13)                  | 50 (34)                      | 41.0          |

ET: essential thrombocythemia; MPN: myeloproliferative neoplasm; PMF: primary myelofibrosis; PV: polycythemia vera; SMF: secondary myelofibrosis; VAF: variant allele frequency.

**Table S3.** Contingency table for Pearson's  $\chi^2$  test to evaluate the association between *JAK2* mutation and thrombotic event in patients with ET, PMF and SMF post-ET ( $n = 44$ ).

|                     | No event (%) | Event (%) | Total | <i>p</i> value |
|---------------------|--------------|-----------|-------|----------------|
| <i>JAK2</i> WT      | 16 (53.3)    | 4 (28.6)  | 20    | 0.124          |
| <i>JAK2</i> mutated | 14 (46.7)    | 10 (71.4) | 24    |                |
| Total               | 30           | 14        | 44    |                |

ET: essential thrombocythemia; PMF: primary myelofibrosis; SMF: secondary myelofibrosis; WT: wild type.

**Table S4.** Contingency tables for Pearson's  $\chi^2$  test to evaluate the association between thrombotic event and DTA mutation or any non-driver mutation in *JAK2*-mutated versus *JAK2* wild-type patients with ET, PMF and SMF post-ET ( $n = 44$ ).

|                    | <i>JAK2</i> mutated |           |       |                | <i>JAK2</i> WT |           |       |                |
|--------------------|---------------------|-----------|-------|----------------|----------------|-----------|-------|----------------|
|                    | No event (%)        | Event (%) | Total | <i>p</i> value | No event (%)   | Event (%) | Total | <i>p</i> value |
| DTA WT             | 11 (78.6)           | 9 (90)    | 20    |                | 11 (68.8)      | 4 (100)   | 15    |                |
| DTA mutated        | 3 (21.4)            | 1 (10)    | 4     | 0.459          | 5 (31.3)       | 0 (0)     | 5     | 0.197          |
| Total              | 14                  | 10        | 24    |                | 16             | 4         | 20    |                |
| Non-driver WT      | 9 (64.3)            | 8 (80)    | 17    |                | 8 (50)         | 3 (75)    | 11    | 0.369          |
| Non-driver mutated | 5 (35.7)            | 2 (20)    | 7     | 0.404          | 8 (50)         | 1 (25)    | 9     |                |
| Total              | 14                  | 10        | 24    |                | 16             | 4         | 20    |                |

DTA: *DNMT3A/TET2/ASXL1*; ET: essential thrombocythemia; PMF: primary myelofibrosis; SMF: secondary myelofibrosis; WT: wild type.



Table S5. Patient characteristics of age-matched PV case-control cohort,  $n = 55$ .

| Gender | Diagnosis | Age at diagnosis | Occurrence of thrombosis before diagnosis | Event pre-diagnosis | Event post-diagnosis | JAK2 VAF | DTA mutation | VAF DTA mutation                                                      | Other pathogenic non-driver mutations | VAF other pathogenic non-driver mutations     | Progression to AML | Exitus     |
|--------|-----------|------------------|-------------------------------------------|---------------------|----------------------|----------|--------------|-----------------------------------------------------------------------|---------------------------------------|-----------------------------------------------|--------------------|------------|
| 1      | F         | PV               | 73                                        | no                  | no                   | no       | 61.83        | <i>DNMT3A</i> c.2645G>A p.R882Hs                                      | 46.73                                 | <i>TP53</i> c.524G>A p.R175H/c.722C>T p.S241F | 19.88/64.79        |            |
| 2      | F         | PV               | 70                                        | yes                 | arterial             | no       | 27.9         | <i>DNMT3A</i> c.958C>T p.R320*                                        | 50.3                                  |                                               |                    |            |
| 3      | F         | PV               | 74                                        | no                  | no                   | no       | 36.7         |                                                                       |                                       |                                               | yes                | 21/12/2019 |
| 4      | M         | PV               | 38                                        | no                  | no                   | venous   | 30.7         | <i>ASXL1</i> c.4015G>T p.G1339*, <i>TET2</i> c.5458delA p.S1820Vfs*13 | 1.2, 3.2                              |                                               |                    |            |
| 5      | F         | PV               | 73                                        | no                  | no                   | no       | 74.4         |                                                                       |                                       |                                               |                    |            |
| 6      | M         | PV               | 61                                        | yes                 | arterial             | no       | 49.9         | <i>DNMT3A</i> c.73-227_177+479del splice_donor_cds_indel              | 1.3                                   |                                               |                    |            |
| 7      | F         | PV               | 86                                        | yes                 | no                   | arterial | 49.9         | <i>TET2</i> c.1852C>T p.Q618*/c.1630C>T p.R544*                       | 48/45.8                               |                                               |                    |            |
| 8      | F         | PV               | 73                                        | yes                 | venous               | no       | 47.7         | <i>TET2</i> c.3782G>C p.R1261P                                        | 28.1                                  |                                               |                    | 09/12/2016 |
| 9      | F         | PV               | 80                                        | no                  | no                   | no       | 34.6         | <i>TET2</i> c.5650A>G p.T1884A                                        | 42.9                                  |                                               |                    |            |
| 10     | F         | PV               | 64                                        | no                  | no                   | venous   | 60.4         | <i>TET2</i> c.5354delA p.K1785Rfs*35                                  | 2.0                                   |                                               |                    |            |
| 11     | F         | PV               | 83                                        | no                  | no                   | no       | 77.2         |                                                                       |                                       | <i>RUNX1</i> c.1265_1266delAG p.E422Afs*?     | 28.9               |            |
| 12     | F         | SMF-post PV      | 61                                        | no                  | venous               | venous   | 82.2         | <i>TET2</i> c.1683_1689delACCAG GA p.K561Nfs*5                        | 38.3                                  |                                               |                    |            |

| Gender | Diagnosis | Age at diagnosis | Occurrence of thrombosis before diagnosis | Event pre-diagnosis | Event post-diagnosis | JAK2 VAF         | DTA mutation | DTA mutation                                                                    | DTA mutation    | Other pathogenic non-driver mutations | VAF other pathogenic non-driver mutations | Progression to AML | Exitus     |
|--------|-----------|------------------|-------------------------------------------|---------------------|----------------------|------------------|--------------|---------------------------------------------------------------------------------|-----------------|---------------------------------------|-------------------------------------------|--------------------|------------|
| 13     | M         | SMF-post PV      | 65                                        | no                  | no                   | no               | 15.9         | <i>TET2</i> c.3594+1G>T p.?                                                     | 13.4            | <i>SRSF2</i> c.161C>A p.S54Y          | 11.1                                      |                    |            |
| 14     | F         | SMF-post PV      | 59                                        | no                  | no                   | no               | 57           | <i>TET2</i> c.3500+1G>T p.?                                                     | 18.9            |                                       |                                           |                    | 28/05/2019 |
| 15     | M         | SMF-post PV      | 62                                        | no                  | no                   | no               | 30.3         | <i>DNMT3A</i> c.2255T>A p.F752Y, <i>TET2</i> c.3578G>A p.C1193Y                 | 1.3, 1.0        |                                       |                                           |                    |            |
| 16     | F         | SMF-post PV      | 42                                        | no                  | no                   | no               | 93.8         |                                                                                 |                 | <i>NRAS</i> c.68T>C p.L23P            | 7.7                                       |                    | 13/05/2018 |
| 17     | M         | PV               | 62                                        | no                  | no                   | venous           | 12.9         | <i>TET2</i> c.1630C>T p.R544*                                                   | 5.2             |                                       |                                           |                    |            |
| 18     | M         | PV               | 44                                        | no                  | no                   | venous           | 96.5         | <i>TET2</i> c.3260delC p.S1087Ffs*19                                            | 47.6            |                                       |                                           |                    |            |
| 19     | F         | PV               | 47                                        | no                  | no                   | no               | 16.8         |                                                                                 |                 |                                       |                                           |                    |            |
| 20     | F         | PV               | 59                                        | yes                 | venous               | venous, arterial | 40.5         | <i>TET2</i> c.2746C>T p.Q916*/c.4315A>T p.K1439*/c.3845G>A p.G1282D             | 40.1/ 9.8/ 18.9 |                                       |                                           |                    |            |
| 21     | M         | PV               | 69                                        | no                  | no                   | no               | 34.6         | <i>TET2</i> c.3508C>T p.Q1170*/ c.3660delC p.C1221Vfs*5/c.1971dupA p.H658Tfs*23 | 12.3/ /1.8 /1.8 |                                       |                                           |                    | 21/04/2016 |
| 22     | F         | PV               | 79                                        | no                  | no                   | no               | 14.6         |                                                                                 |                 | <i>TP53</i> c.783-2A>T p.?            | 4.0                                       |                    |            |
| 23     | F         | PV               | 86                                        | no                  | no                   | no               | 50.4         | <i>TET2</i> c.1815_1817delCACins AA p.Y605*fs*1 <i>ASXL1</i> c.1636C>T          | 6.8             |                                       |                                           |                    |            |
| 24     | M         | PV               | 83                                        | no                  | no                   | no               | 38.8         | p.Q546*, <i>TET2</i> c.4119_4123delATGTT p.C1374Gfs*25                          | 42.4, 37.6      | <i>SRSF2</i> c.284C>A p.P95H          | 43.1                                      |                    |            |

| Gender | Diagnosis | Age at diagnosis | Occurrence of thrombosis before diagnosis | Event pre-diagnosis | Event post-diagnosis | JAK2 VAF         | DTA mutation | DTA mutation                                                                             | Other pathogenic non-driver mutations | VAF other pathogenic non-driver mutations | Progression to AML | Exitus     |
|--------|-----------|------------------|-------------------------------------------|---------------------|----------------------|------------------|--------------|------------------------------------------------------------------------------------------|---------------------------------------|-------------------------------------------|--------------------|------------|
| 25     | F         | PV               | 78                                        | no                  | no                   | no               | 17.3         | <i>DNMT3A</i> c.1701_1704delTCGC p.K569Afs*57, <i>TET2</i> c.3847_3880del p.A1283Tfs*69  |                                       | 44.2, 36.8                                |                    |            |
| 26     | M         | PV               | 45                                        | no                  | no                   | no               | 17           |                                                                                          |                                       |                                           |                    |            |
| 27     | F         | PV               | 58                                        | no                  | no                   | no               | 84.1         |                                                                                          |                                       |                                           |                    |            |
| 28     | F         | PV               | 66                                        | yes                 | arterial             | no               | 11.9         | <i>ASXL1</i> c.2077C>T p.R693*                                                           |                                       | 23.3                                      |                    |            |
| 29     | M         | PV               | 63                                        | yes                 | arterial             | no               | 63.7         | <i>DNMT3A</i> c.1211+1G>A p.?/ c.1395+1G>T p.?                                           |                                       | 32.9/ 2.3                                 |                    |            |
| 30     | M         | PV               | 83                                        | yes                 | venous, arterial     | no               | 5.4          | <i>DNMT3A</i> c.2189G>A p.R730H/ c.2255C>Tp.P752L/ c.1367dupTp.F457Lfs*3                 |                                       | 16.7/ 3.1/ 1.5                            |                    |            |
| 31     | M         | PV               | 42                                        | yes                 | arterial             | no               | 22.2         |                                                                                          |                                       |                                           |                    |            |
| 32     | M         | PV               | 66                                        | no                  | no                   | no               | 72.8         |                                                                                          |                                       |                                           |                    |            |
| 33     | M         | PV               | 54                                        | no                  | no                   | no               | 31.5         |                                                                                          |                                       |                                           |                    |            |
| 34     | M         | PV               | 68                                        | yes                 | arterial             | venous, arterial | 75           | <i>TET2</i> c.3333_3334del p.L1111Ffs*18                                                 |                                       | 44.7                                      |                    |            |
| 35     | F         | PV               | 59                                        | no                  | no                   | no               | 20.8, 18.2   |                                                                                          |                                       |                                           | yes                |            |
| 36     | F         | PV               | 50                                        | no                  | no                   | venous, arterial | 94.7         |                                                                                          |                                       |                                           |                    | 04/03/2011 |
| 37     | M         | PV               | 63                                        | no                  | no                   | no               | 52.9         |                                                                                          |                                       |                                           |                    | 29/10/2015 |
| 38     | F         | PV               | 67                                        | no                  | no                   | no               | 38.3         |                                                                                          |                                       |                                           |                    | 30/04/2008 |
| 39     | F         | PV               | 74                                        | yes                 | no                   | venous           | 58.2         | <i>DNMT3A</i> c.1270del p.1424Lfs*75, <i>TET2</i> c.346C>Tp.Q116*/ c.1482del p.T495Qfs*2 |                                       | 46.3, 10.5/ 4.3                           |                    |            |
| 40     | M         | PV               | 53                                        | yes                 | no                   | arterial         | 38.1, 63.2   |                                                                                          | <i>EZH2</i> c.2188C>T p.Q730*         | 13.4                                      |                    | 06/01/2014 |

|    | Gender | Diagnosis | Age at diagnosis | Occurrence of thrombosis before diagnosis | Event pre-diagnosis | Event post-diagnosis | JAK2 VAF   | DTA mutation                                                                                 | VAF DTA mutation | Other pathogenic non-driver mutations                                                          | VAF other pathogenic non-driver mutations | Progression to AML | Exitus     |
|----|--------|-----------|------------------|-------------------------------------------|---------------------|----------------------|------------|----------------------------------------------------------------------------------------------|------------------|------------------------------------------------------------------------------------------------|-------------------------------------------|--------------------|------------|
| 41 | M      | PV        | 74               | no                                        | no                  | no                   | 17.2       |                                                                                              |                  |                                                                                                |                                           |                    | 29/08/2017 |
| 42 | M      | PV        | 50               | yes                                       | no                  | venous               | 55.3       |                                                                                              |                  |                                                                                                |                                           |                    | 13/11/2017 |
| 43 | F      | PV        | 49               | no                                        | no                  | no                   | 74.1       |                                                                                              |                  | <i>TP53</i> c.80C>T p.P27L                                                                     | 1.7                                       |                    |            |
| 44 | F      | PV        | 75               | no                                        | no                  | no                   | 49.3, 2.5  |                                                                                              |                  |                                                                                                |                                           |                    | 29/04/2014 |
| 45 | M      | PV        | 66               | no                                        | arterial            | no                   | 23.8       | <i>ASXL1</i> c.2771_2781delinsT p.P924Lfs*18)                                                | 3.3              | <i>SF3B1</i> c.1998G>T p.K666N                                                                 | 40.9                                      |                    |            |
| 46 | F      | PV        | 80               | yes                                       | arterial            | no                   | 33.8, 47.2 | <i>DNMT3A</i> c.1484T>A p.L647H                                                              | 6.9              |                                                                                                |                                           |                    |            |
| 47 | M      | PV        | 56               | no                                        | no                  | no                   | 82.5       |                                                                                              |                  |                                                                                                |                                           |                    |            |
| 48 | M      | PV        | 55               | no                                        | no                  | no                   | 75.7       |                                                                                              |                  |                                                                                                |                                           |                    | 05/10/2018 |
| 49 | F      | PV        | 54               | no                                        | no                  | no                   | 44.3       | <i>DNMT3A</i> c.2598-3_2599del<br>splice_donor_cds_indel,<br><i>TET2</i> c.3764dupA p.Y1255* | 4.6, 1.4         |                                                                                                |                                           |                    |            |
| 50 | F      | PV        | 67               | yes                                       | arterial            | arterial             | 32.8       | <i>TET2</i> c.2926C>T p.Q976*                                                                | 3.5              | <i>EZH2</i> c.1680_1681insA p.R561Tfs*26,<br><i>TP53</i> c.831T>G p.C277W/<br>c.427G>A p.V143M | 1.3, 3.5/<br>1.2                          | yes                |            |
| 51 | F      | PV        | 72               | no                                        | no                  | no                   | 66.8, 31.1 |                                                                                              |                  |                                                                                                |                                           | yes                |            |
| 52 | F      | PV        | 66               | yes                                       | no                  | arterial             | 24.9       | <i>TET2</i> c.1876C>T p.Q626*                                                                | 22.4             |                                                                                                |                                           |                    |            |
| 53 | M      | PV        | 55               | yes                                       | arterial            | no                   | 62.7       |                                                                                              |                  |                                                                                                |                                           |                    |            |

| Gender | Diagnosis | Age at diagnosis | Occurrence of thrombosis before diagnosis | Event pre-diagnosis | Event post-diagnosis | <i>JAK2</i> VAF | DTA mutation | DTA mutation                                                                         | DTA mutation  | Other pathogenic non-driver mutations | VAF other pathogenic non-driver mutations | Progression to AML | Exitus |
|--------|-----------|------------------|-------------------------------------------|---------------------|----------------------|-----------------|--------------|--------------------------------------------------------------------------------------|---------------|---------------------------------------|-------------------------------------------|--------------------|--------|
| 54     | F         | PV               | 83                                        | no                  | no                   | no              | 60.1         | <i>DNMT3A</i><br>c.1700_1714del<br>p.V567_A571del, <i>TET2</i><br>c.3782G>A p.R1261H | 44.1,<br>43.6 | <i>SRSF2</i> c.284C>A<br>p.P95H       | 2.3                                       |                    |        |
| 55     | F         | PV               | 69                                        | yes                 | arterial             | no              |              |                                                                                      |               |                                       |                                           |                    |        |

F: female, M: male, TN: triple negative, VAF: variant allele frequency, DTA: *DNMT3A/TET2/ASXL1*, AML: acute myeloid leukemia
